# Supplementary material for: Microtube Array Membrane (MTAM)-Based Encapsulated Cell Therapy for Cancer Treatment
Source: PubMed Central journal article supplement (PMC7281484; doi:10.3390/membranes10050080), 2020-04-26
Supplement: membranes-10-00080-s001.pdf [file membranes-10-00080-s001.pdf]

# Microtube Array Membrane (MTAM) Based Encapsulated Cell Therapy for Cancer Treatment

Chee Ho Chew <sup>1</sup>, Chih-Wei Lee <sup>2,†</sup>, Wan-Ting Huang <sup>3</sup>, Li-Wei Cheng <sup>4</sup>, Amanda Chen <sup>5</sup>, Tsai-Mu Cheng <sup>6</sup>, Yen-Liu Liu<sup>7</sup>, and Chien-Chung Chen <sup>6, 8, 9, 10, 11,\*</sup>

Supplementary Figures:

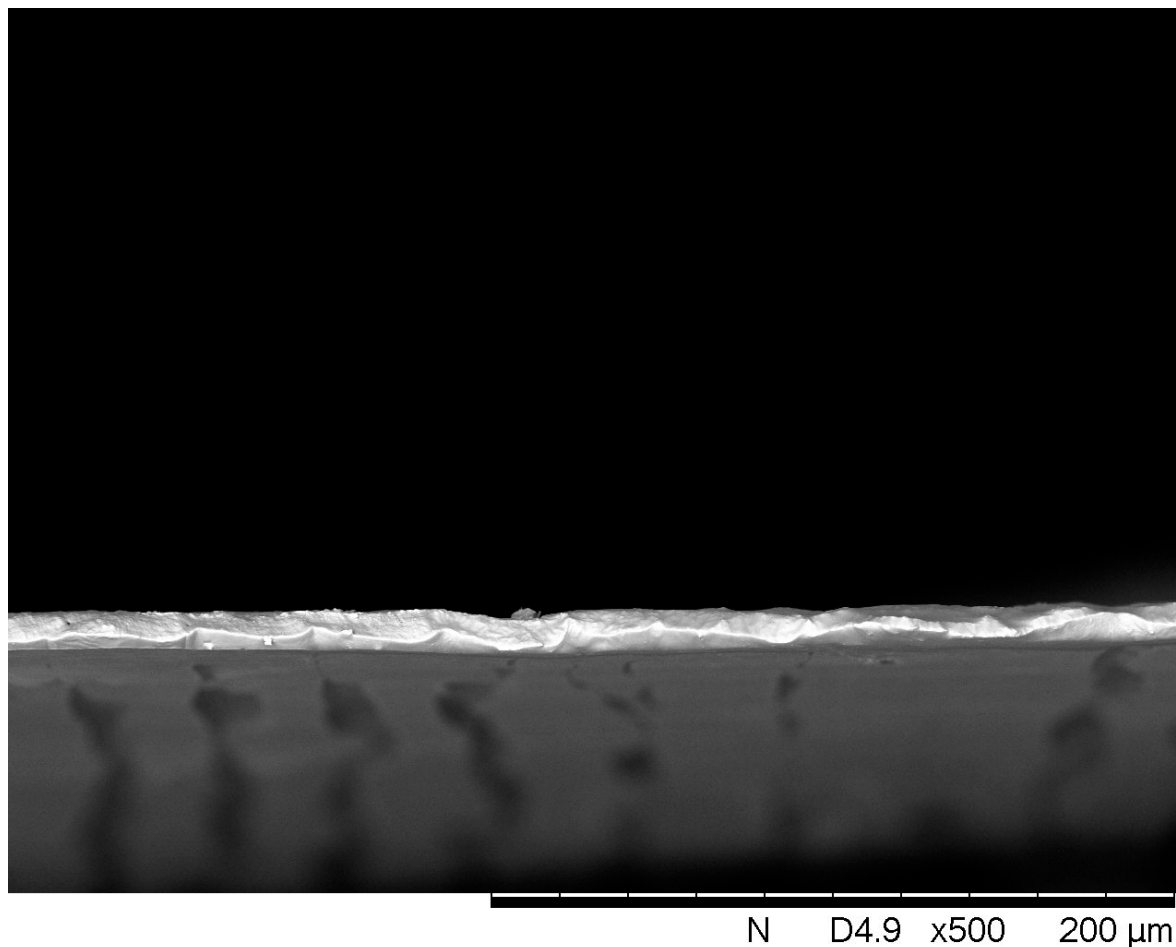

Supplementary figure 1: SEM of the cross section of the heat sealed electrospun PSF MTAM which revealed no openings, forming a continuous seal on the micron/sub-micron scale.

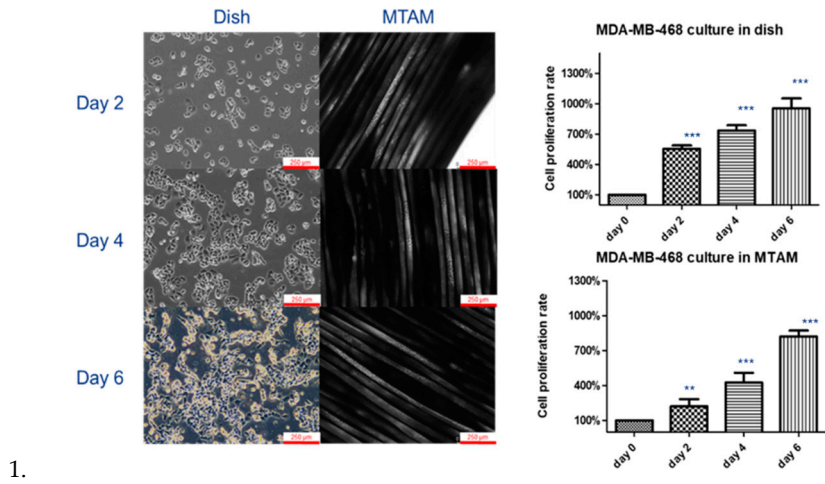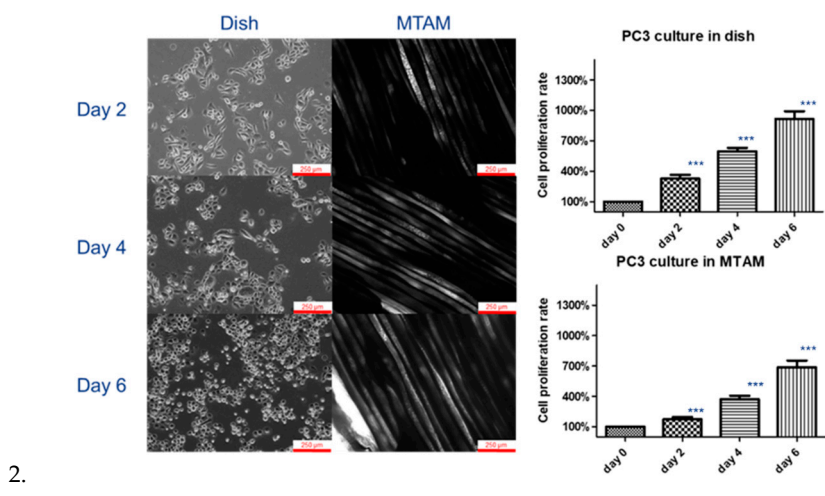

Supplementary figure 2: *In vitro* culture of MDA-MB-468 (top) and PC 3 (bottom) in TCPs and PSF MTAMs. Both culture substrates revealed an increasing viability across time.

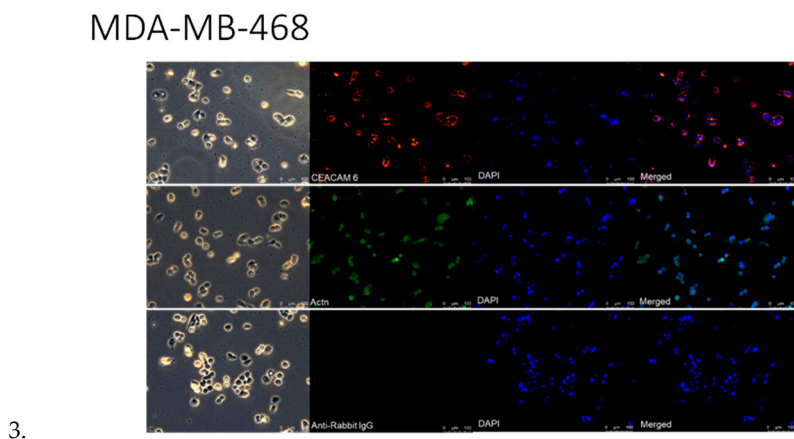

## PC3

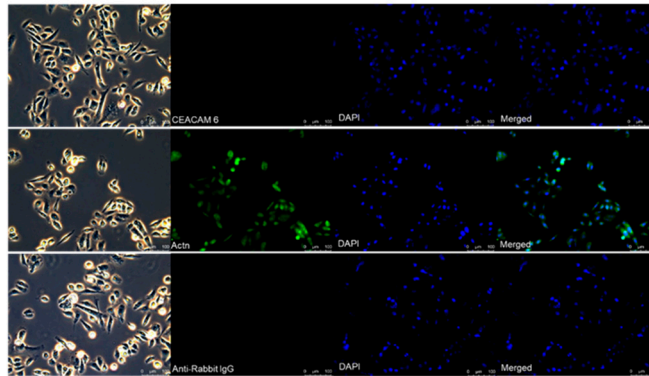

4.

Supplementary figure 3: Immunohistochemistry staining of the respective cancer cells; MDA-MB-468 (top) and PC 3 (bottom). Clearly, PC-3 revealed no immunofluorescence signal when targeted fluorescent antibodies targeting CEACAM 6 were used.
